# Supplementary material for: Pulse electropolymerization of high performance PEDOT/MWCNT counter electrodes for Pt-free dye-sensitized solar cells
Source: Royal Society of Chemistry journal article supplement (doi:10.1039/c2jm34425d), 2012-01-01
Supplement: c2jm34425d.pdf [file c2jm34425d.pdf]

## Supporting Information for “Pulse electropolymerization of high performance PEDOT/MWCNT counter electrodes for Pt-free dye-sensitized solar cells”

Yaoming Xiao,<sup>†ab</sup> Jeng-Yu Lin,<sup>†\*b</sup> Sheng-Yen Tai,<sup>b</sup> Shu-Wei Chou,<sup>b</sup> Gentian Yue,<sup>ab</sup> and Jihuai Wu<sup>\*a</sup>

[<sup>a</sup>] Mr. Y. Xiao, Mr. G. Yue and Dr. J. Wu  
Institute of Materials Physical Chemistry, Huaqiao University, Quanzhou,  
Fujian 362021, China  
Tel: +86-595-22693899; Fax: +86-595-22692229  
E-mail: [jhwu@hqu.edu.cn](mailto:jhwu@hqu.edu.cn)

[<sup>b</sup>] Mr. S. Y. Tai, Mr. S. W. Chou and Dr. J. Y. Lin  
Department of Chemical Engineering, Tatung University, No. 40, Sec. 3, ChungShan  
North Rd., Taipei City 104, Taiwan  
Tel: +866-22592-5252 ext.2561-119; Fax: +866-22586-1939  
E-mail: [jylin@ttu.edu.tw](mailto:jylin@ttu.edu.tw)

[<sup>†</sup>] These authors contributed equally

[\*] Corresponding authors

---

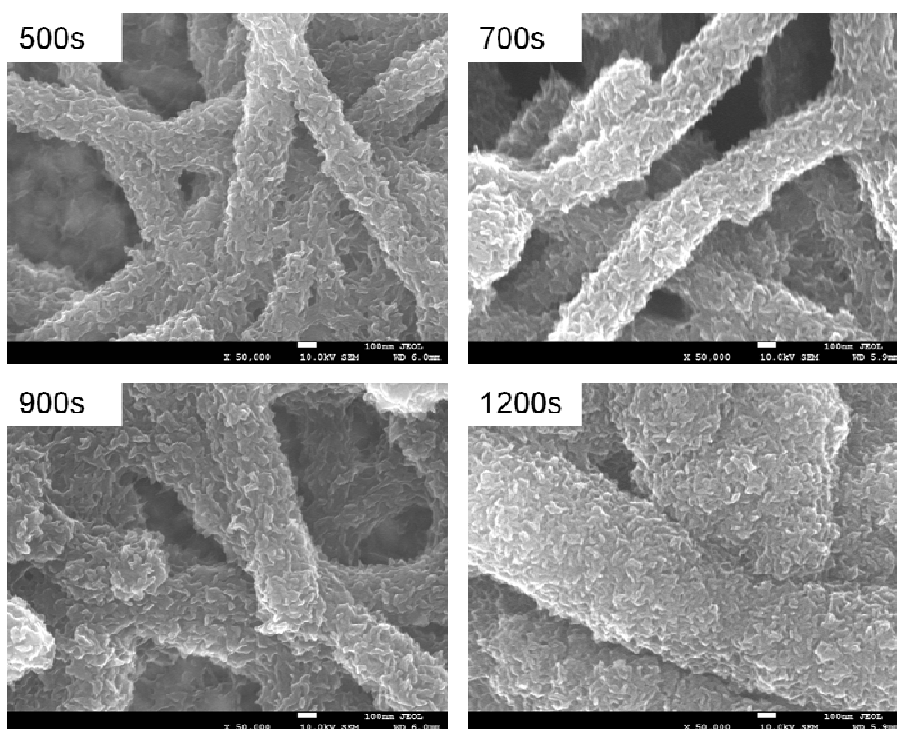

Figure S1 FESEM images of PEDOT/MWCNT CEs with various electropolymerization durations.

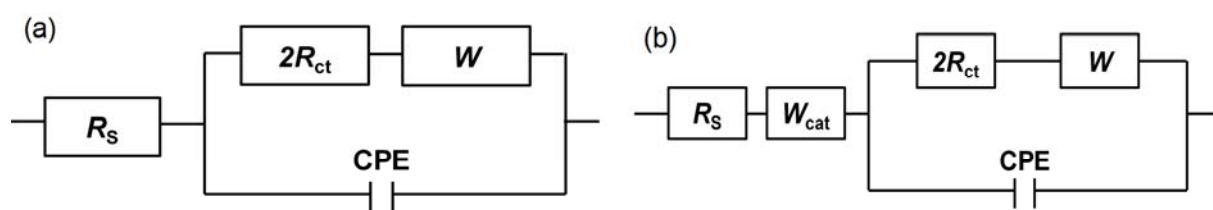

Figure S2 Equivalent circuits used for fitting the EIS results of the symmetric cells.
